# Supplementary material
Source: PubMed Central journal article supplement (PMC5235996)

## Supplementary Data

### Supplementary Figure Legends

**Supplementary Figure 1.** Generalized additive model plots of lipid biomarkers in relation to cardiac calcification measures after full adjustment for covariates. Adjustment is as in Model 2, Table 3, including age, sex, race, education, BMI, systolic blood pressure, antihypertensive treatment, diabetes, smoking, eGFR, prevalent coronary heart disease, prevalent stroke/transient ischemic attack, prevalent peripheral arterial disease, LDL, HDL, log(triglycerides) and log(CRP). Biomarker values at the upper 1% of the distribution have been excluded to enhance presentation of the graphs, but these were not influential (i.e., their exclusion did not result in meaningful differences in the functional form of the associations).

**Supplementary Figure 2.** Generalized additive model plots of inflammation biomarkers in relation to cardiac calcification measures after full adjustment for covariates. Adjustment is for the same covariates as in Supplemental Figure 1, except in the case of IL-6, where log(CRP) is not included as a covariate. Biomarker values at the upper 1% of the distribution have been excluded to enhance presentation of the graphs, but these were not influential.

**Supplementary Figure 3.** Generalized additive model plots of mineral biomarkers in relation to cardiac calcification measures after full adjustment for covariates. Adjustment is for the same covariates as in Supplemental Figure 1. Biomarker values at the extreme 1% of the distribution (upper and lower ends for fetuin-A; upper end for FGF-23) have been excluded to enhance presentation of the graphs, but these were not influential.

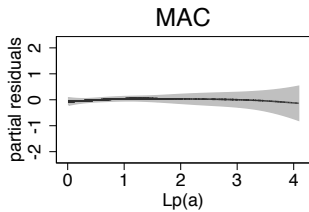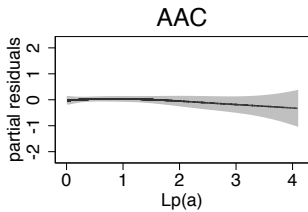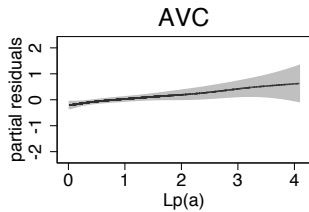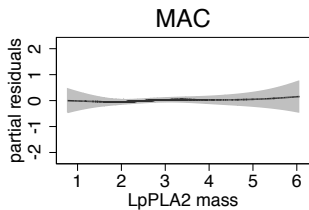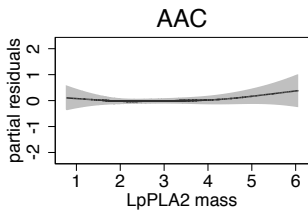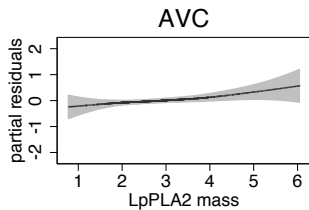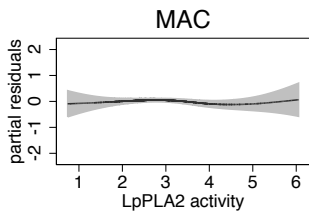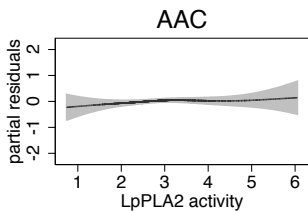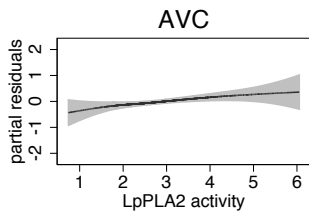

SUPPLEMENTARY FIGURE 1

**MAC**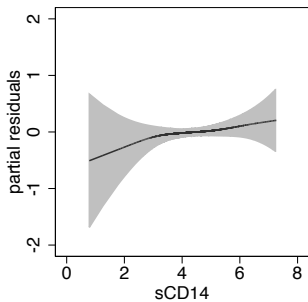**AAC**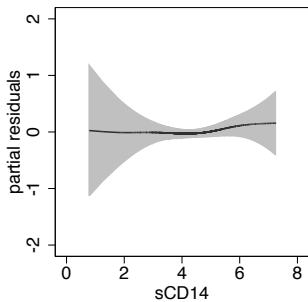**AVC**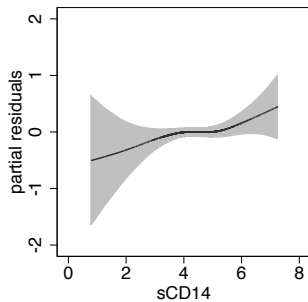**MAC**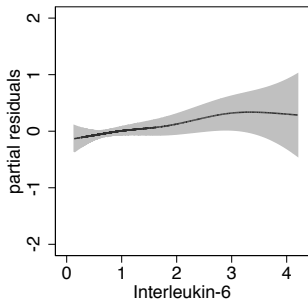**AAC**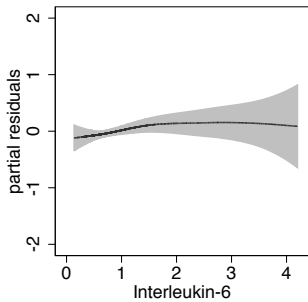**AVC**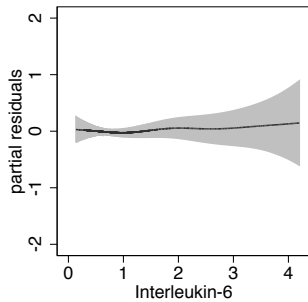

MAC

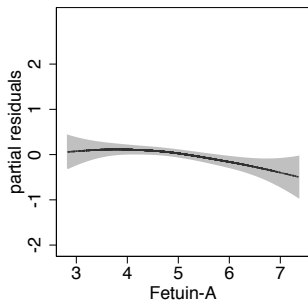

AAC

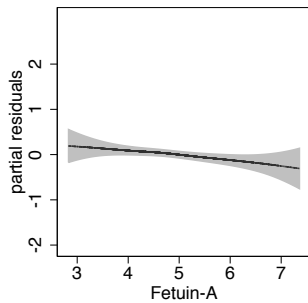

AVC

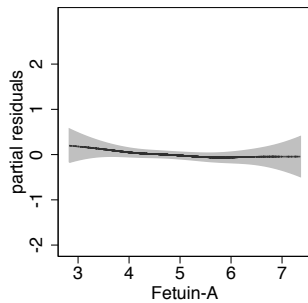

MAC

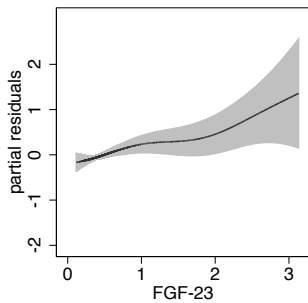

AAC

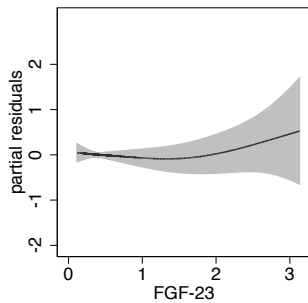

AVC

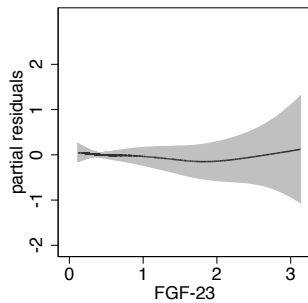

Supplement: NIHMS813462-supplement-01.pdf [file NIHMS813462-supplement-01.pdf]
